# Supplementary material
Source: MDPI journal article supplement (https://www.mdpi.com/2079-9276/9/6/63)
Supplement: s1 [file s1]

**TABLE I**

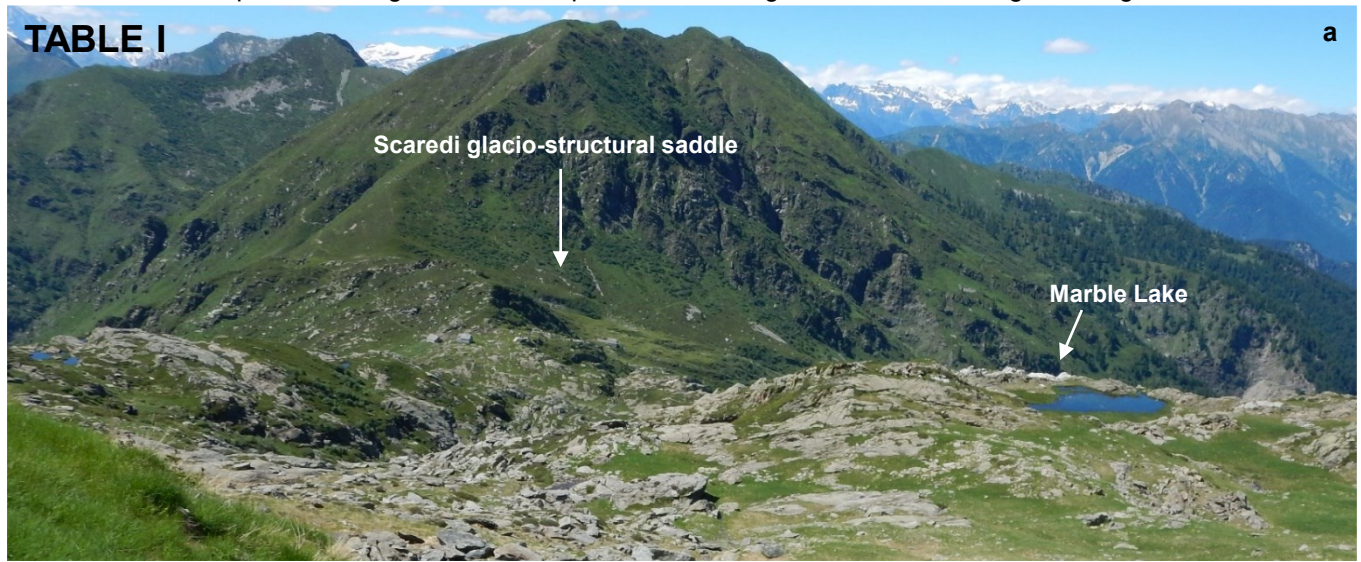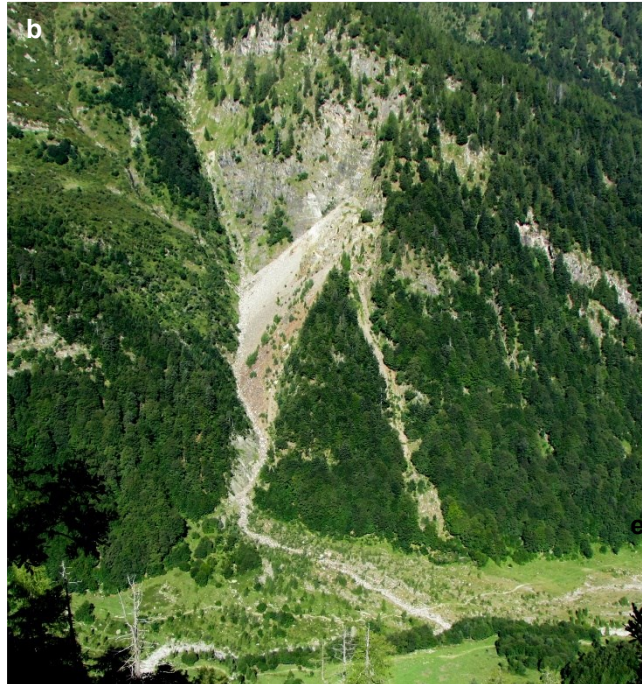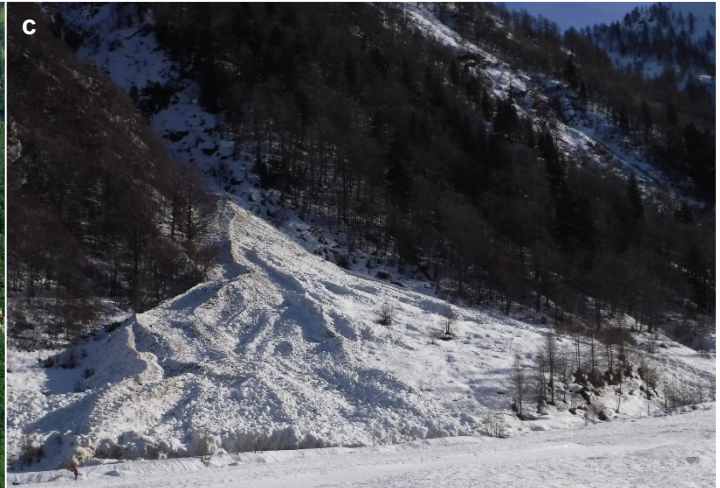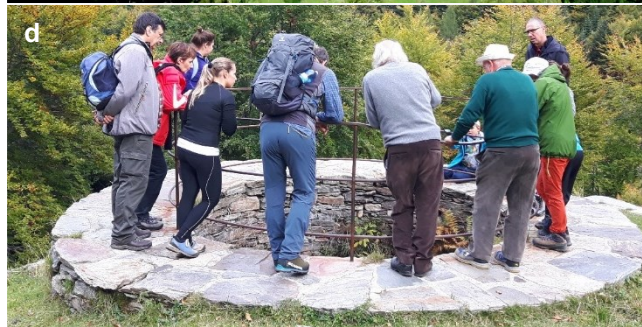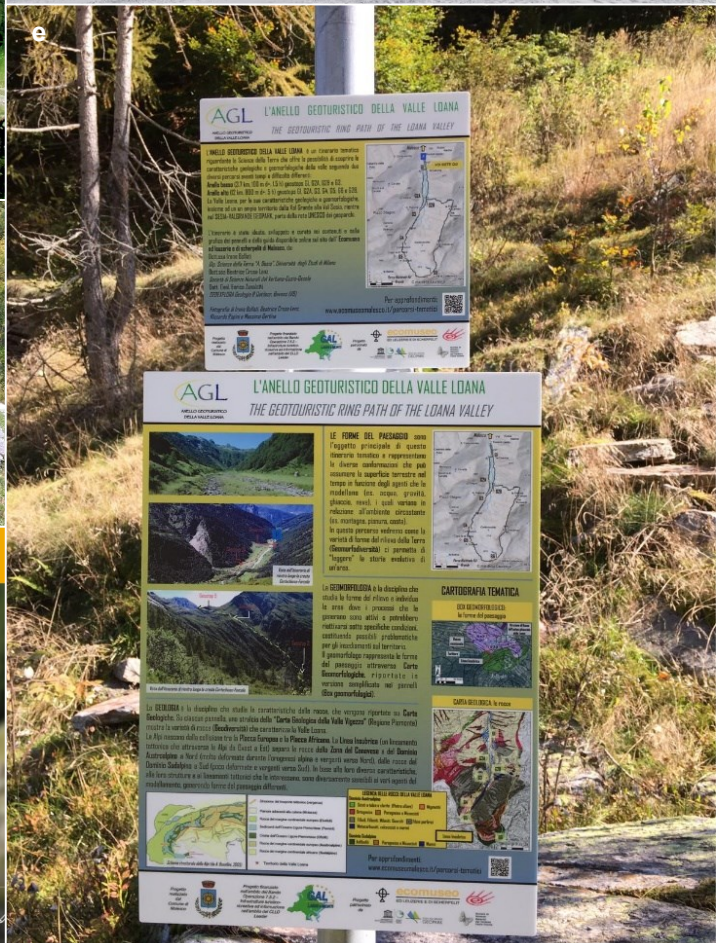

Museo Archeologico della pietra ollare - Malesco

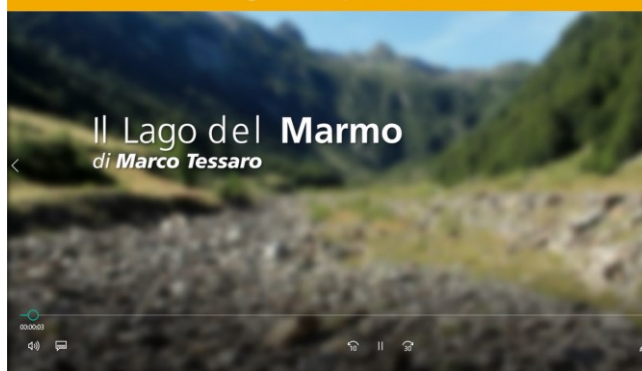

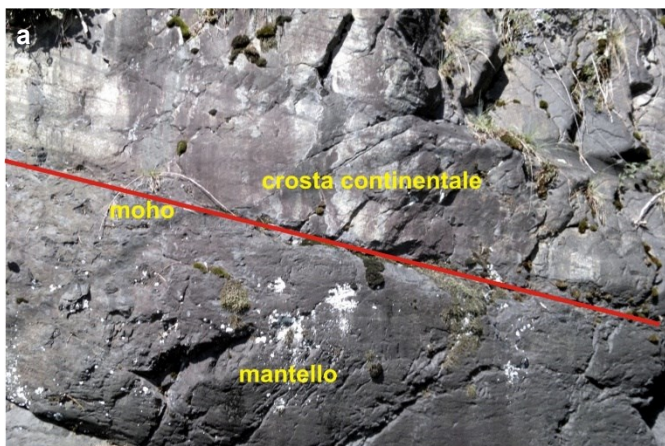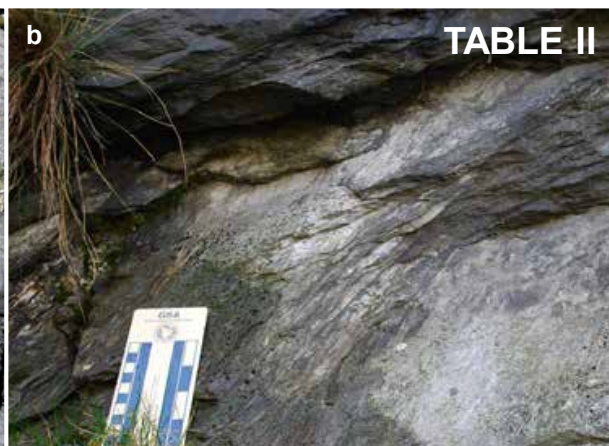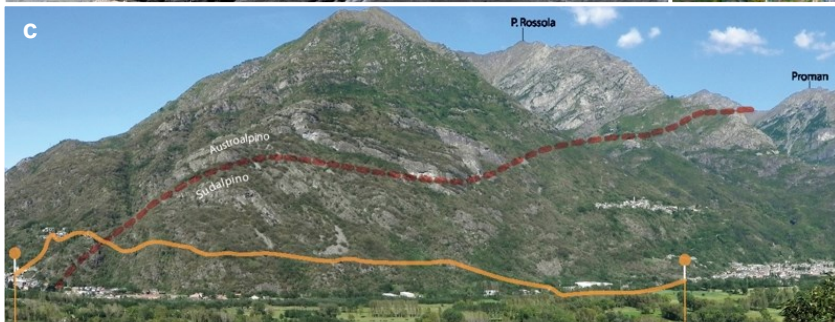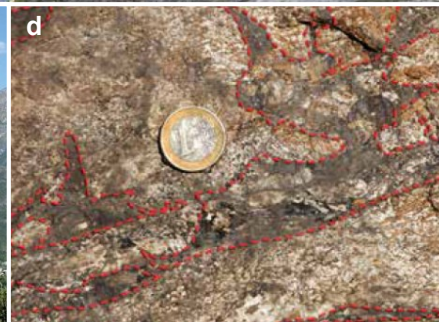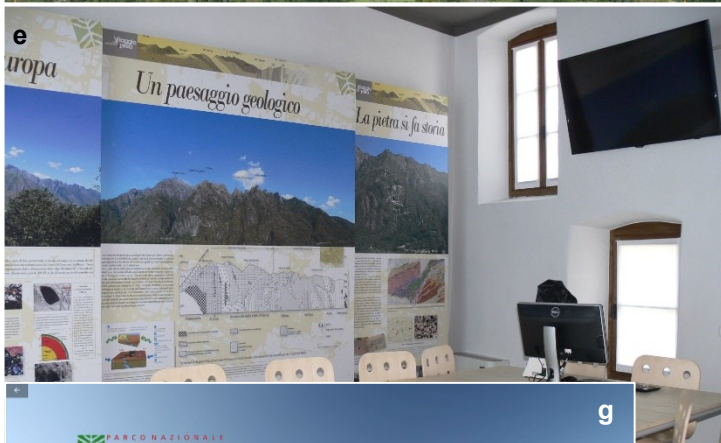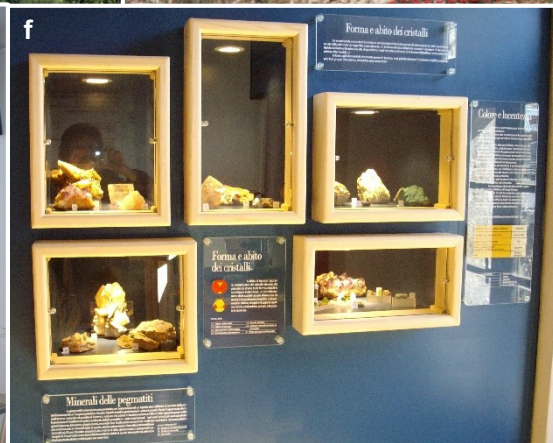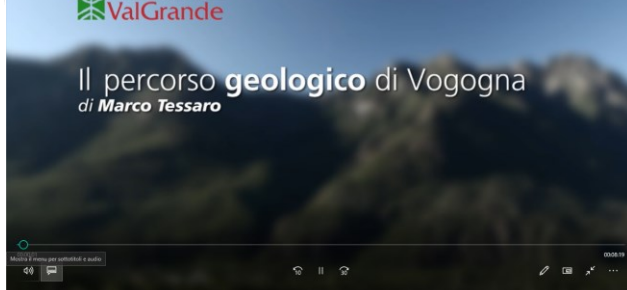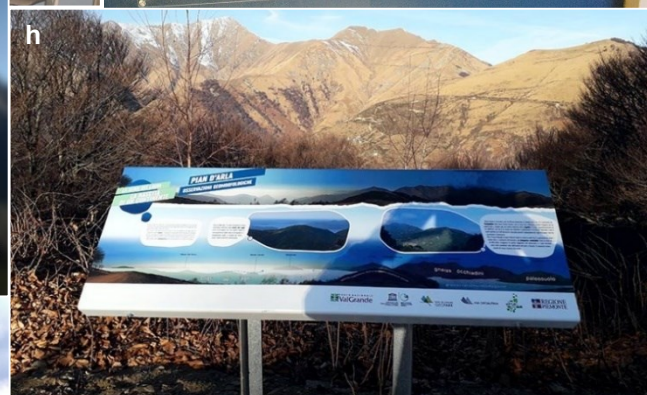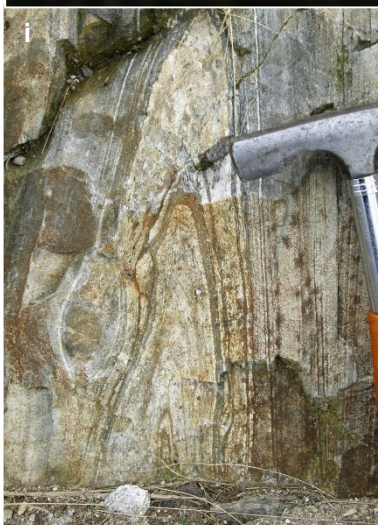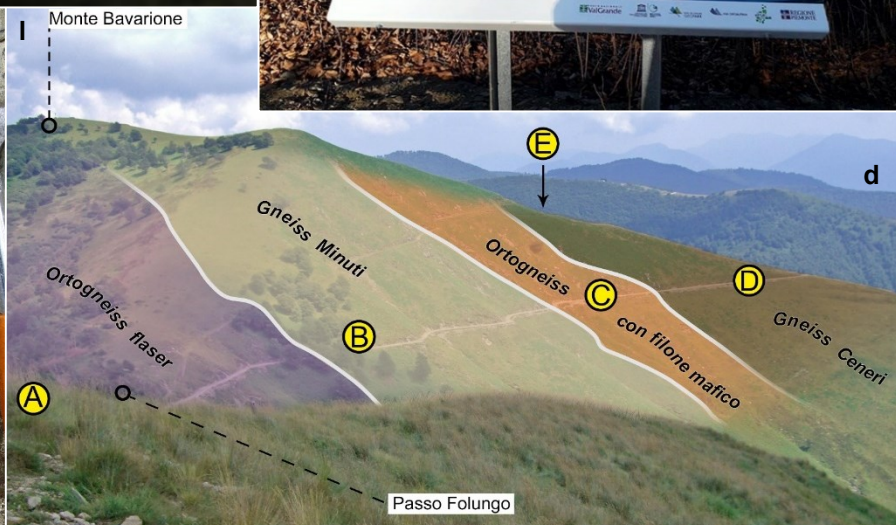

TABLE III

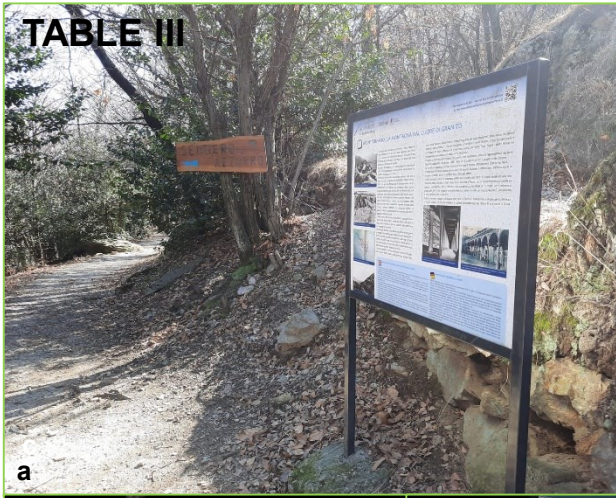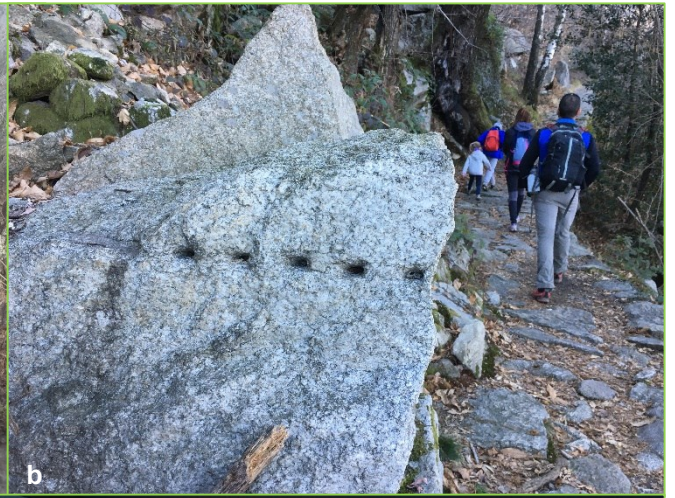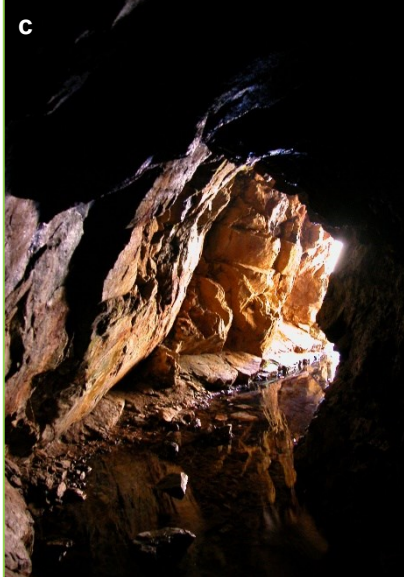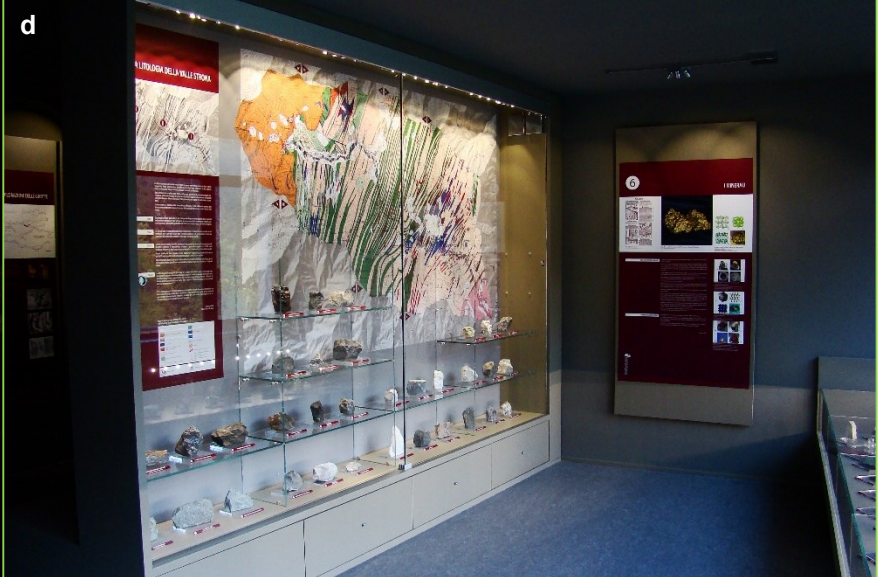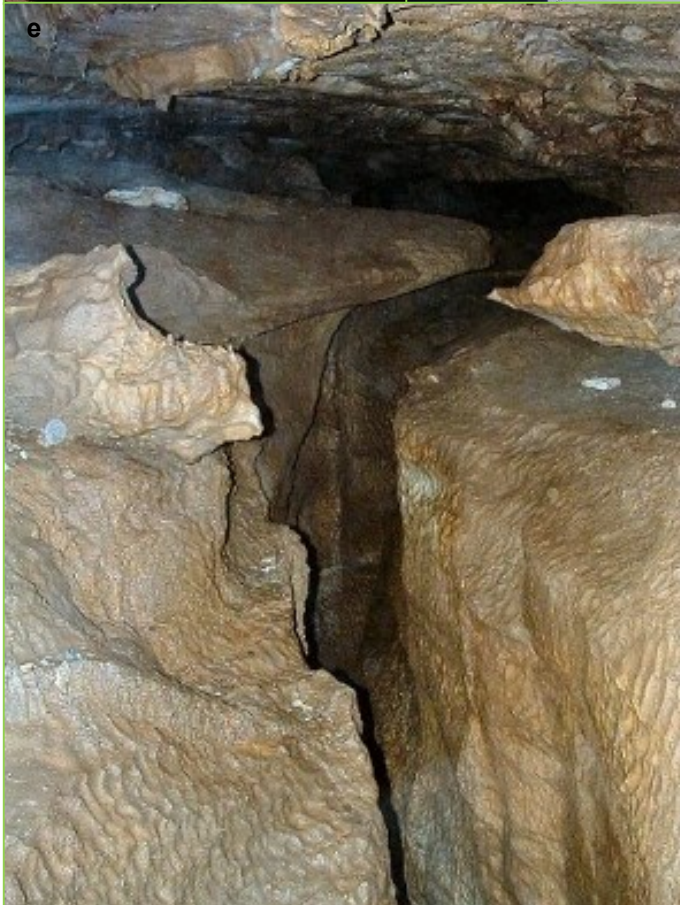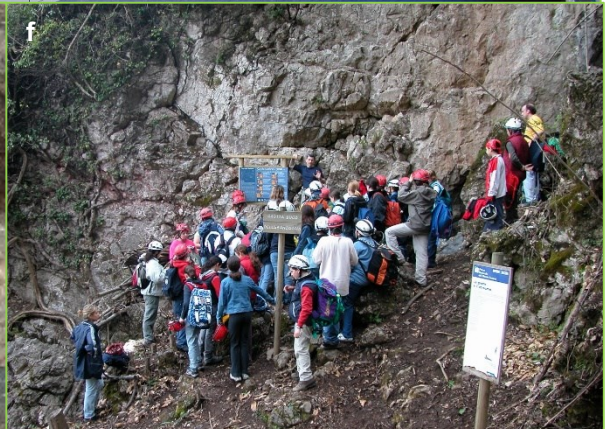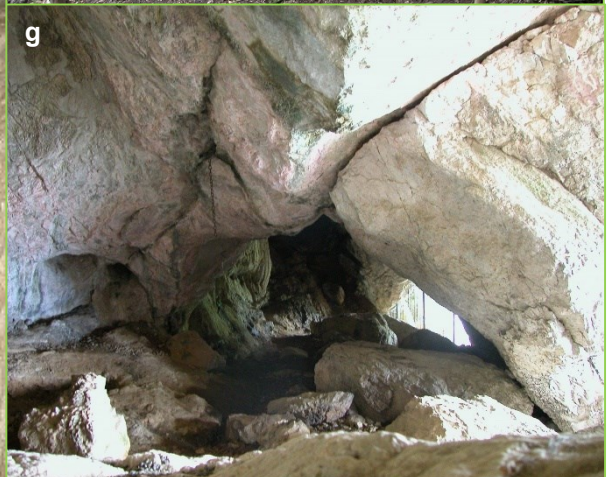

TABLE IV

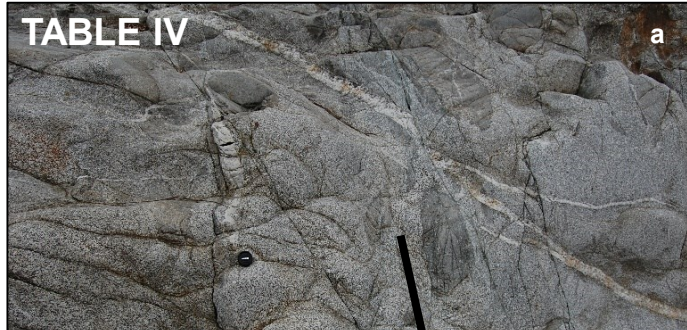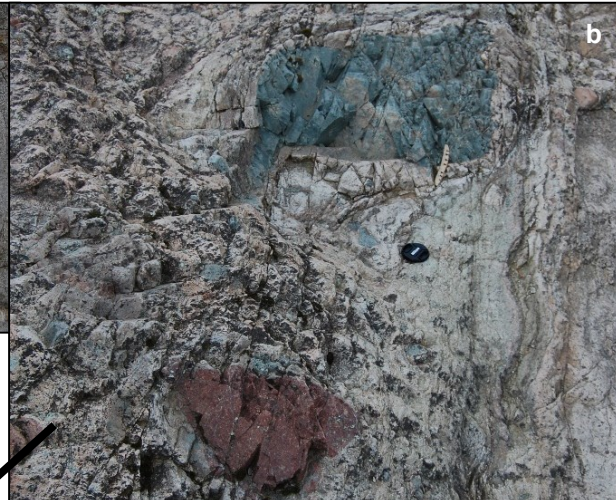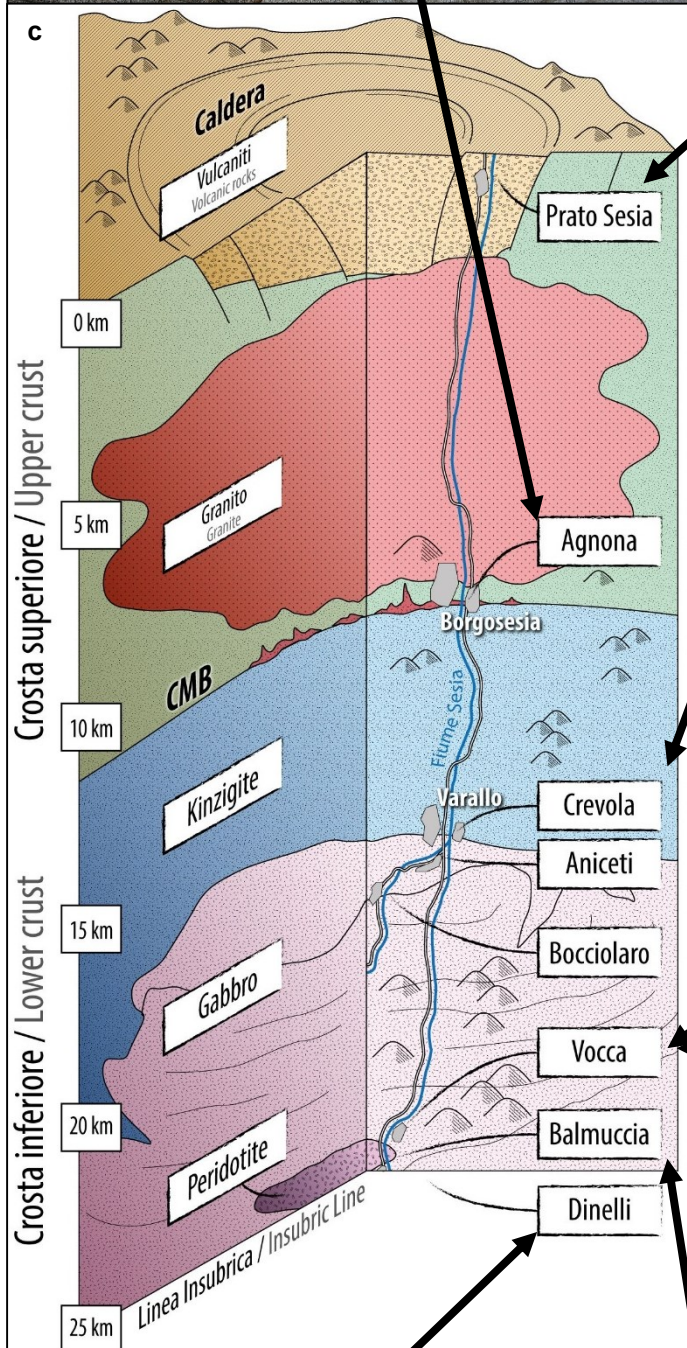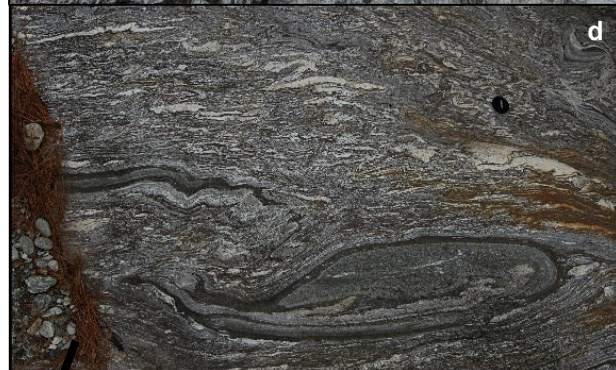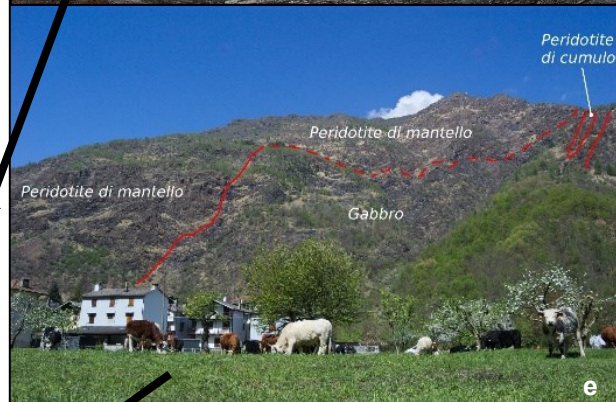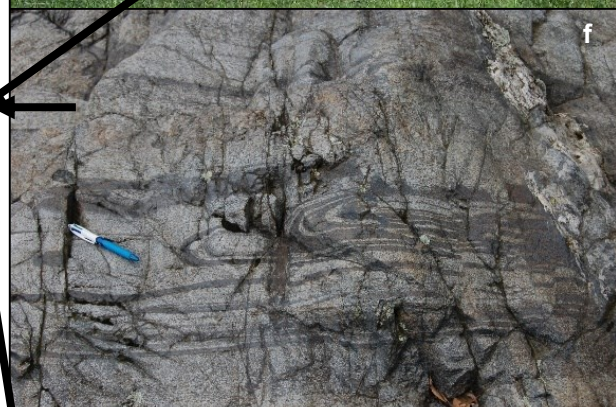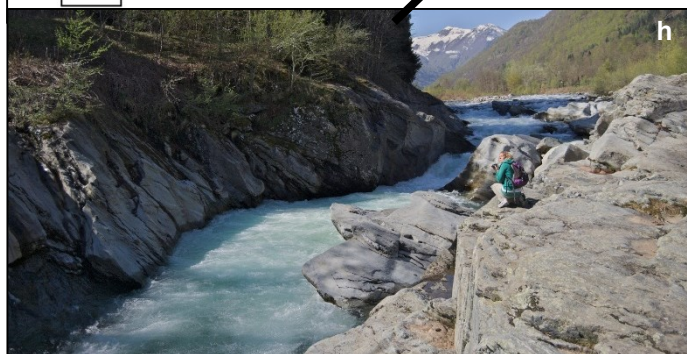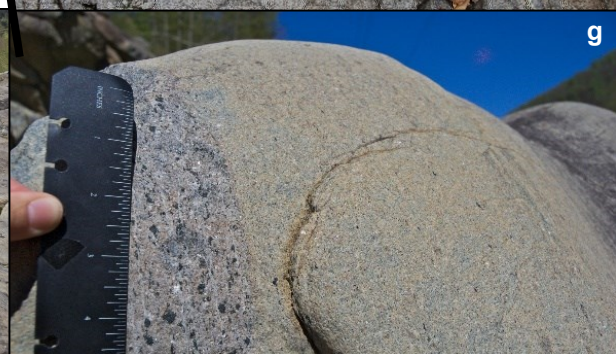

TABLE V

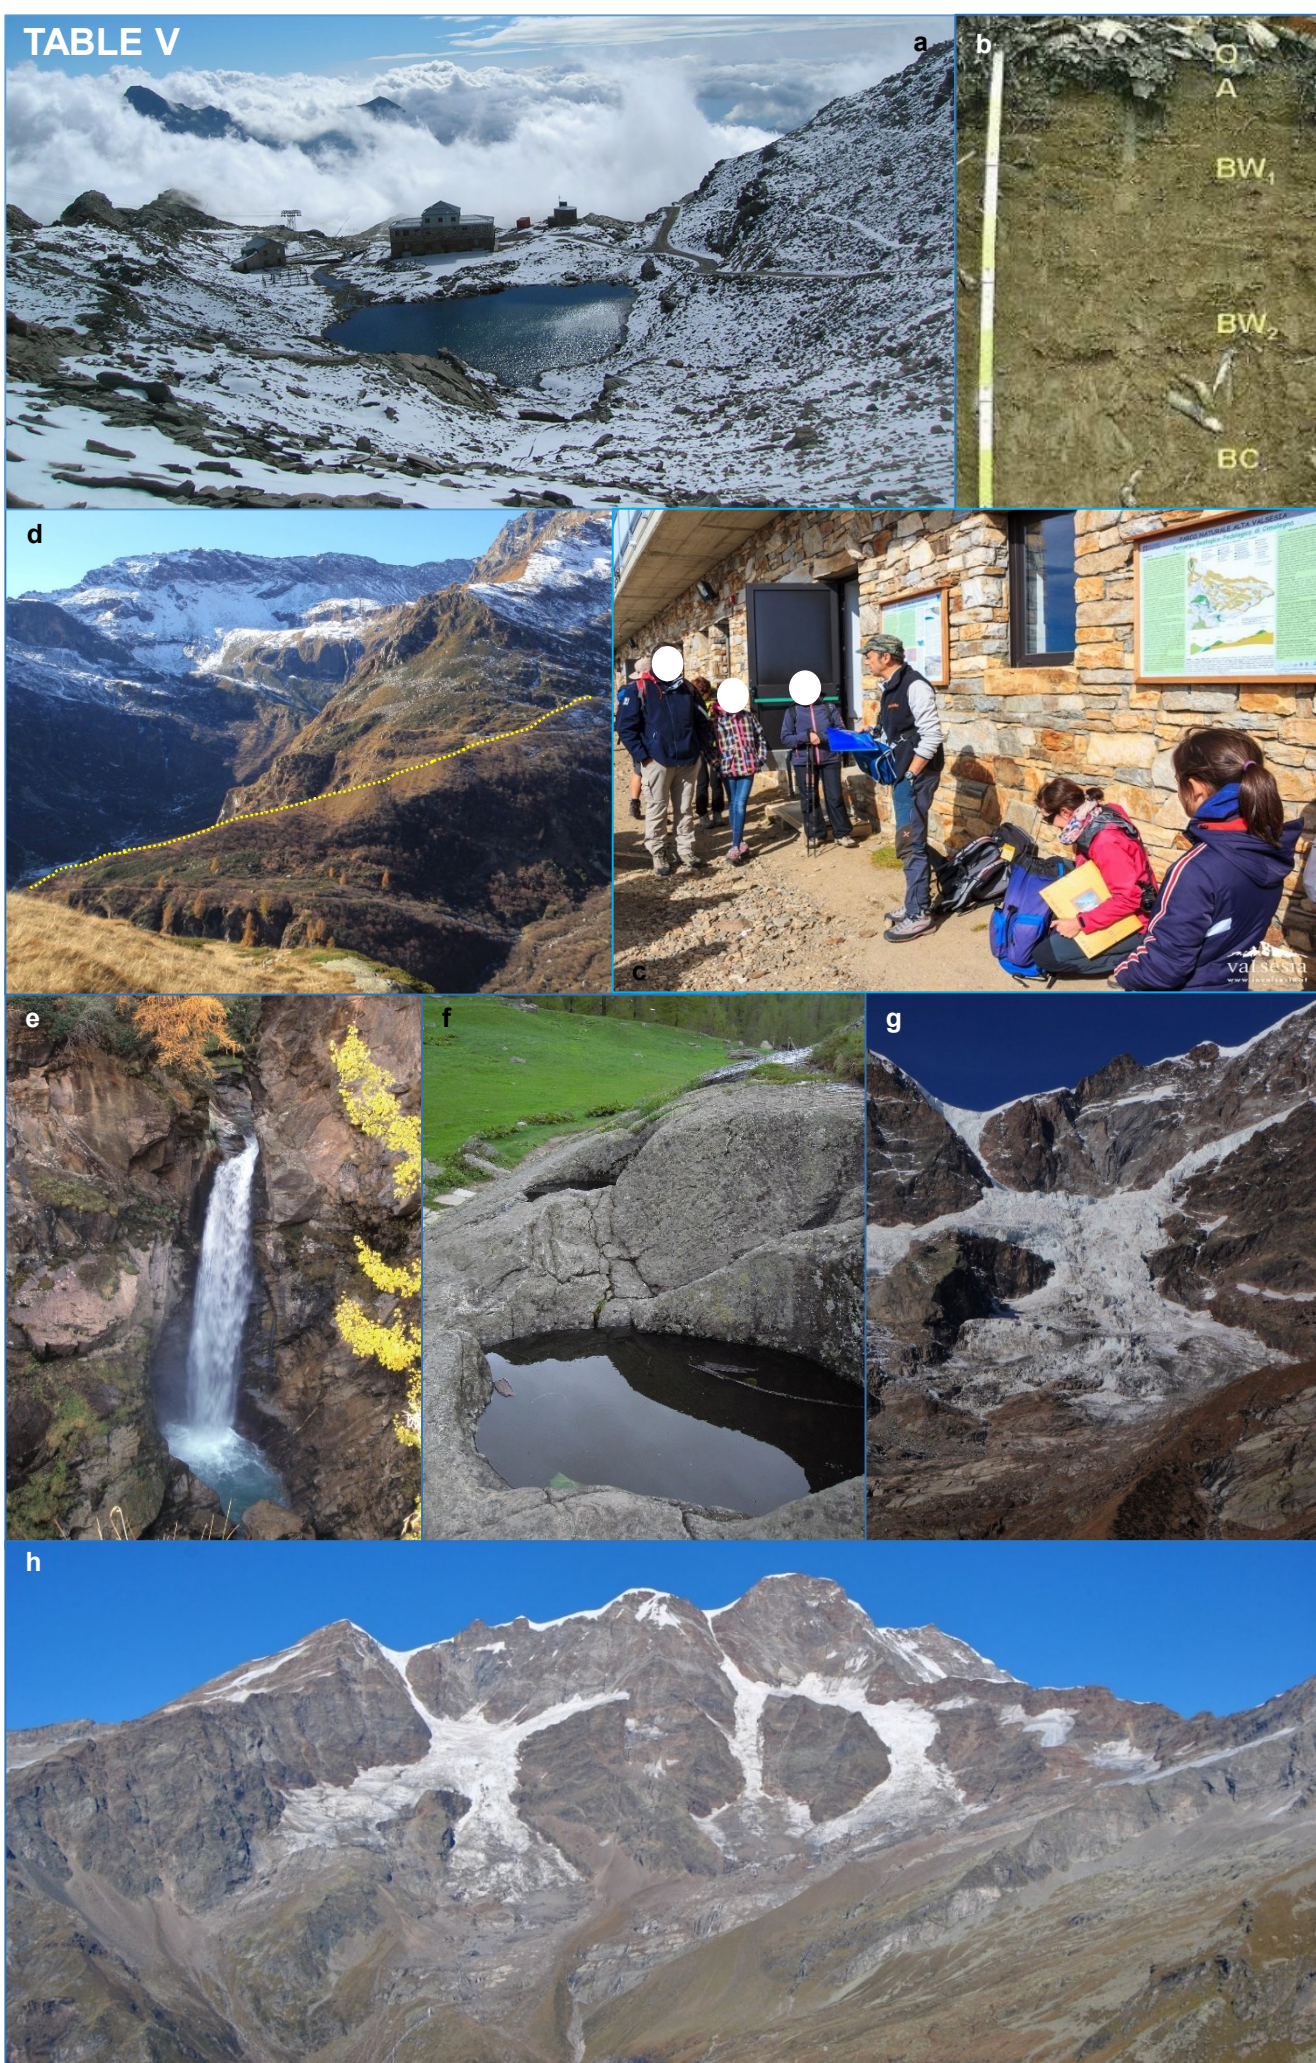

## TABLE I

### *Loana Valley Geotouristic ring trail (1, SF 2)*

- Scaredi glaciostructural saddle along the Canavese Line and the Marble Lake (27, SF 1)
- Pizzo Stagno landslide (18, SF 1)
- Snow avalanche accumulation along the trail during January, 2020
- Fornaci della calce* (lime kilns) during a guided tour in the framework of the opening of the geotrail (12th October, 2019)
- Example of the panels on-site, at the beginning of the geotrail.
- Example of the video available on the screens inside the Ecomuseum Leuzerie et Scherpelit in Malesco municipality (5, SF 3)

## TABLE II

### *The South Alpine basements geotrails - Spatio-temporal journey inside the Earth depth (18; SF 2)*

- Moho surface in outcrop at Premosello Chiovenda (51, SF 1)
- Phyllonites along the Canavese Line at Vogogna Village (8, SF 1)
- Panoramic view on the contact between Austroalpine and South Alpine domains along the Insubric Line
- Glassy pseudotachylyte veins (52, SF 1)
- e, f) Images from the Geolab «Luigi Burlini» in Vogogna village (6, SF 3)
- Video of the geological trail available on the geopark web site

### *The South Alpine basements geotrails - The continental crust birth: geological trail along the Cadorna route (5; SF 2)*

- Example of the panels on-site, at Pian d'Arla (43, SF 1)
- Fold in Gneiss Minuti with a Calc-silicate inclusion
- Example of the rendering for representing a geological section at the Mt. Bavarione

## TABLE III

### *The Blue trail (9, SF 2)*

- Example of the panels on-site, at the beginning of the geotrail
- A quarried block of granite along the trail

### *The Strona Valley geological spots*

- Alvani Nickel mine in Campello Monti (32, SF 1)
- Images from the Centro Museale Naturalistico “Mario Bertolani” in Sambughetto village (2, SF 3)
- Sambughetto karst cave (21, SF 1)

### *Cave trail at Mt. Fenera (10, SF 2)*

- Guided tour at the karst cave of Mt. Fenera (22, SF 1)
- View inside the Mt. Fenera karst cave (22, SF 1)

## TABLE IV

### *The Sesia supervolcano trail (2, SF 2)*

- Mingling of mafic and acidic rocks boundary of lower and upper crust at Agnola (1, SF 1)
- Caldera Megabreccia at Prato Sesia (50, SF 1)
- Sketch of the Supervolcano structure present at the Info point in Prato Sesia (7, SF 3)
- Mafic Complex – Kinzigite Formation contact at Crevola (16, SF 1)
- Contact between mantle peridotite and Mafic Complex at Isola di Vocca (25, SF 1)
- High-temperature deformation of gabbro at Isola di Vocca (24, SF 1)
- One of the best preserved mantle peridotites in the world at Balmuccia (41, SF 1)
- Sesia river where mylonite of the Insubric Line outcrop at Dinelli (58, SF 1)

## TABLE V

### *Cimalegna geological-geopedological trail at the Cimalegna plateau (3, SF 2)*

- Mosso Institute at Passo dei Salati (8, SF 3)
- One of the soil profiles illustrated along the trail
- A guided tour along the trail

### *Upper Sesia Valley Natural Park Glaciological trail (4, SF 2) (pictures d, e, f, g, courtesy of C. Leonoris)*

- Fondecco lateral moraine
- Waterfall with potholes along the Sesia river
- Roche moutonnées and giants' kettles
- View on the Piode glacier snout
- Panoramic view on the Mt. Rosa from Sesia Valley (31, SF 1)
